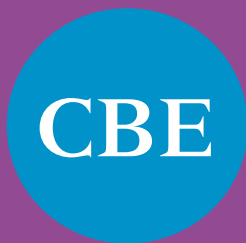

# Life Sciences Education

www.lifescied.org

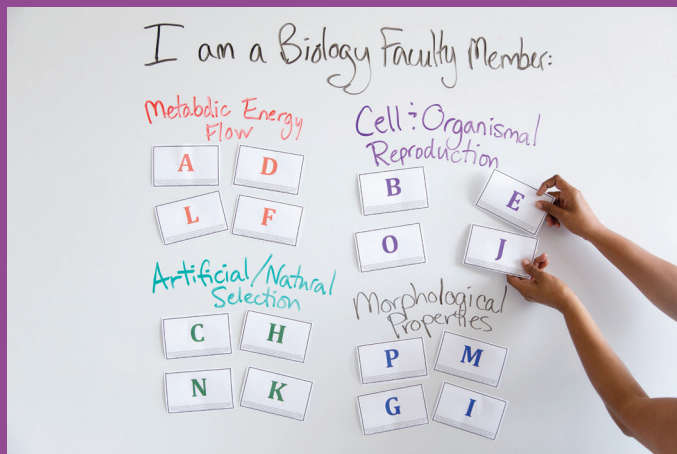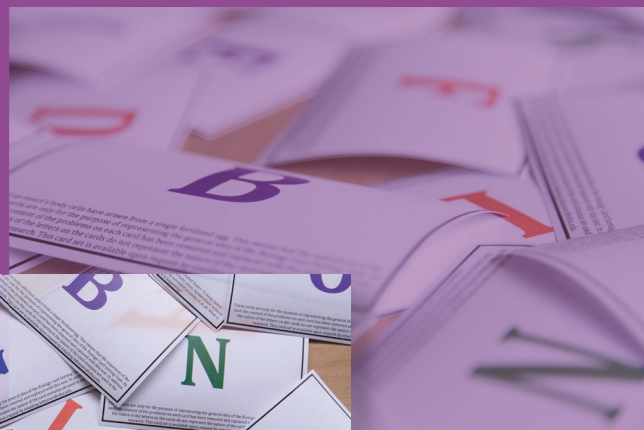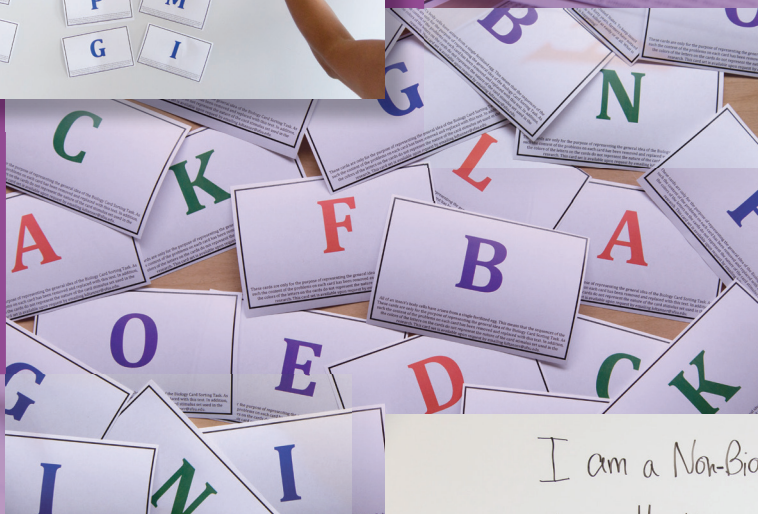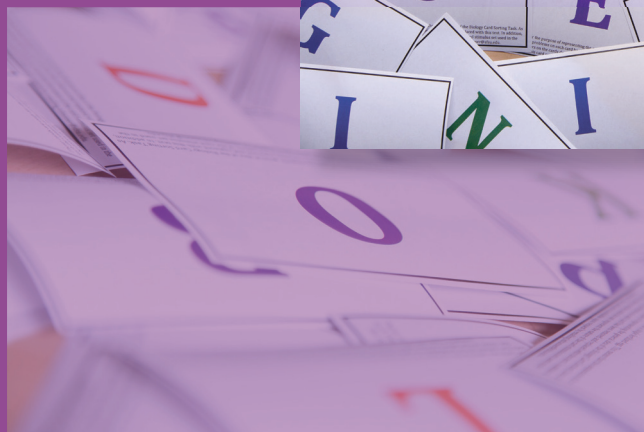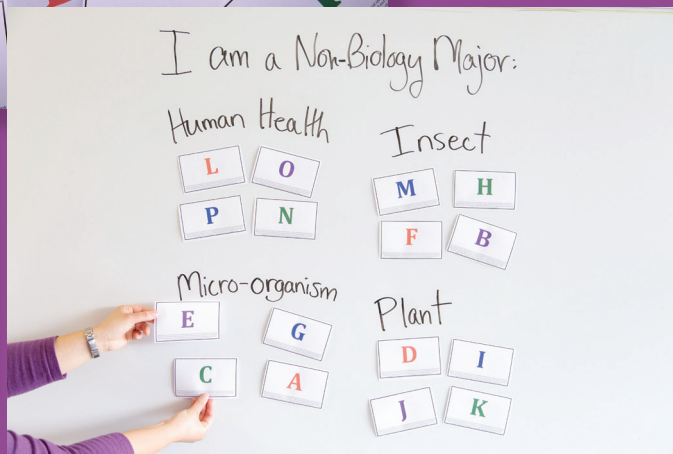

## Organization of Biology Knowledge
